# Supplementary material for: Highly sensitive “turn-on” fluorescence probe for the detection of sparfloxacin in human serum using silica-functionalized CdTe quantum dots
Source: Royal Society of Chemistry journal article supplement (doi:10.1039/c5ra21587k), 2015-01-01
Supplement: c5ra21587k1.pdf [file c5ra21587k1.pdf]

# Electronic Supplementary Material

## Highly Sensitive “Turn-on” Fluorescence Probe for the Detection of Sparfloxacin in Human Serum using Silica-functionalized CdTe Quantum Dots

*Dan Li, \*<sup>[a]</sup> Shaojie Jia, <sup>[a]</sup> Essy Kouadio Fodjo,<sup>[b]</sup> Hu Xu,<sup>[a]</sup> Cong Kong,<sup>[c]</sup> and Yuhong Wang, \*<sup>[a]</sup>*

[a] School of Chemical and Environmental Engineering, Shanghai Institute of Technology, 100 Haiquan Road, Shanghai 201418, P. R. CHINA

[b] Laboratory of Physical Chemistry, University Felix Houphouet Boigny, 22 BP 582 Abidjan 22, Cote d'Ivoire

[c] East China Sea Fisheries Research Institute, Chinese Academy of Fishery Sciences

\*Corresponding author phone/fax: +86-21-60873241; E-mail:dany@sit.edu.cn;  
yuhong\_wang502@sit.edu.cn

## Content

Description of measuring the quantum yield (QY) of carboxyl-capped CdTe@SiO<sub>2</sub> quantum dots (SQDs) (page S2)

Figures S1-S7 (pages S3-S6)

Tables S1-S2 (pages S6-S7)

## Measuring the quantum yield (QY) of SQDs

Typically, the quantum yield (QY) for SQDs is calculated according to the following formula <sup>[1]</sup>:

$$Q = Q_R \times m / m_R \times n^2 / (n_R)^2$$

Where  $Q$  represents the quantum yield (QY),  $m$  is the slope of the plot of integrated PL intensity vs. absorbance and  $n$  is the refractive index (taken here as 1.33, the refractive index of distilled water). In order to minimize the re-absorption effects, the absorbance in the 1 cm quartz cuvette was kept below 0.10 at an excitation wavelength of 550 nm. R is the reference fluorophore, quinine sulfate in a 0.1 M H<sub>2</sub>SO<sub>4</sub> solution. The absorbance was measured on a Shimadzu UV-2100 spectrophotometer.

The PL quantum yield of SQDs was calculated as 32%, indicating that the SQDs exhibit strong fluorescence intensity, which can be used as a novel PL probe for the analysis of SPFX in the biological system.

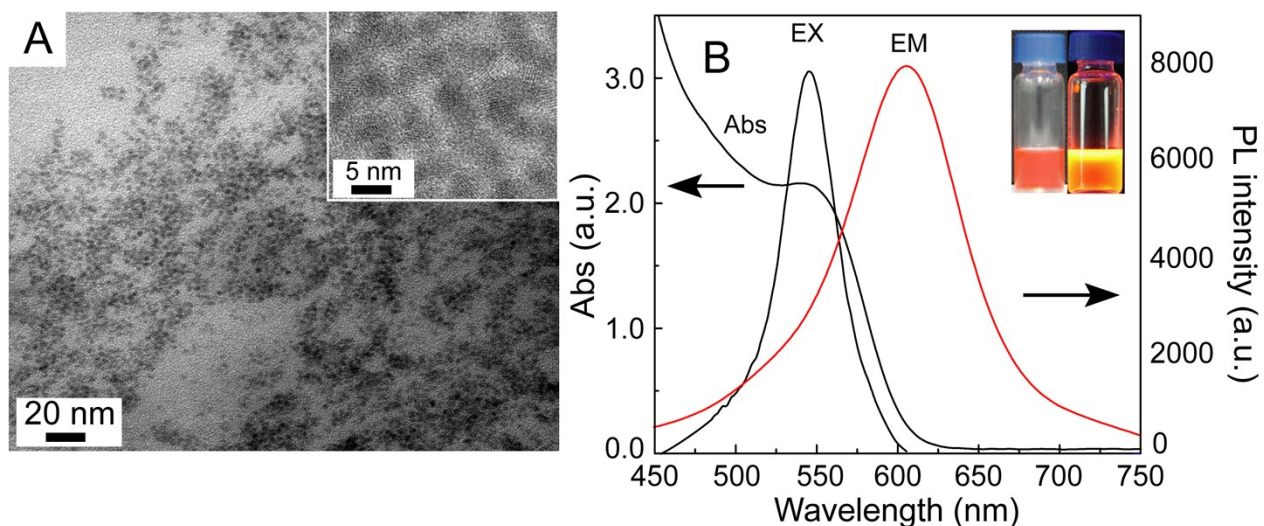

**Fig. S1** (A) TEM image of photoluminescent QDs. Inset: the high-resolution TEM image of QDs. (B) UV and fluorescence spectra of QDs. Inset: photographs of photoluminescent QDs under daylight (left) and 365 nm UV light (right).

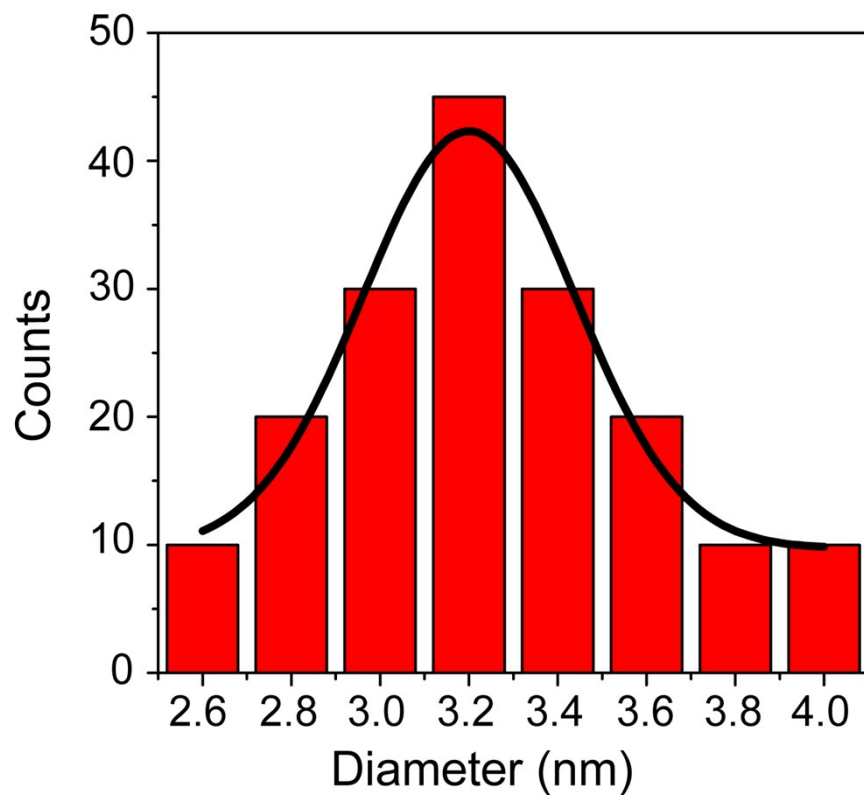

**Fig. S2** Particle size statistics and Gauss fit of QDs.

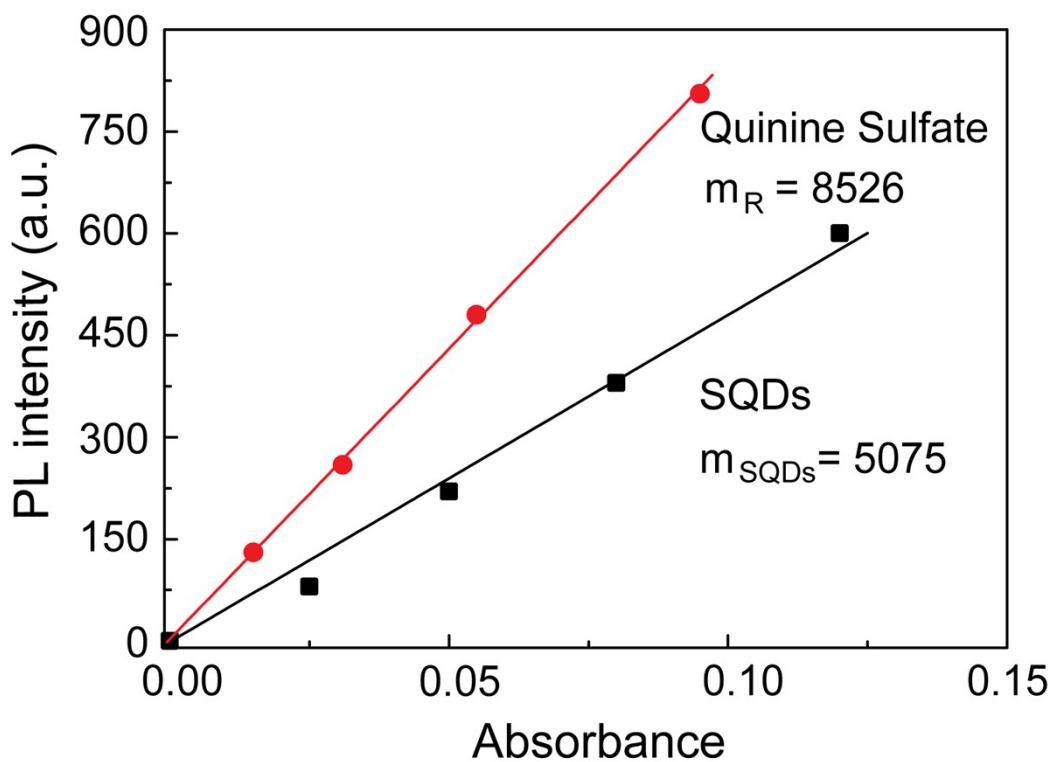

**Fig. S3** Integrated PL intensity versus absorbance plot of SQDs and quinine sulfate.

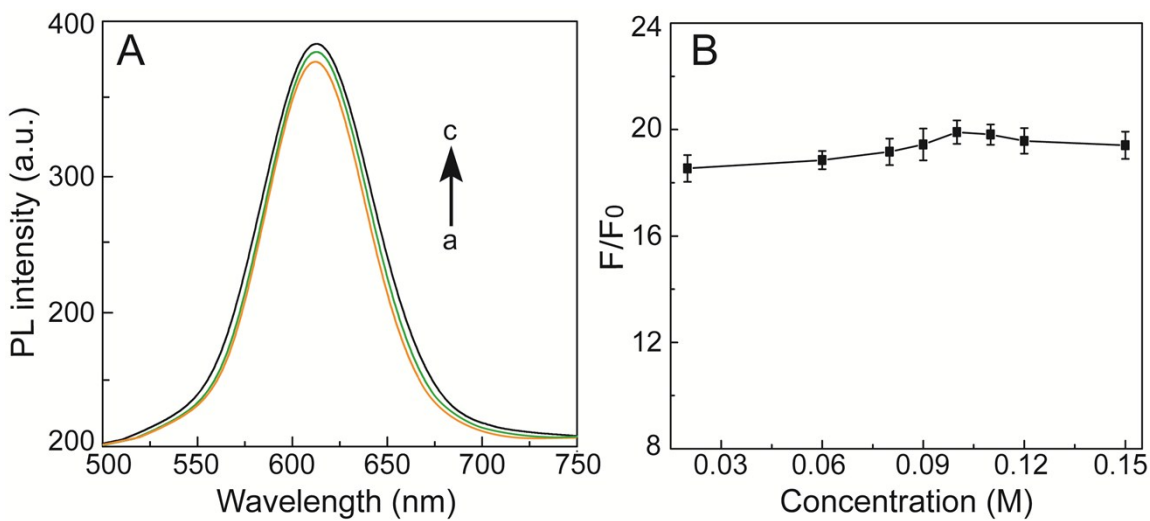

**Fig. S4** The effects of buffer system (A) on the PL intensity of SQDs. a) HAc-NaAc, b)  $KH_2PO_4$ - $K_2HPO_4$ , c) Tris-HCl. The concentrations of Tris-HCl on the PL response  $F/F_0$  of SQDs toward SPFX (20  $\mu$ M).

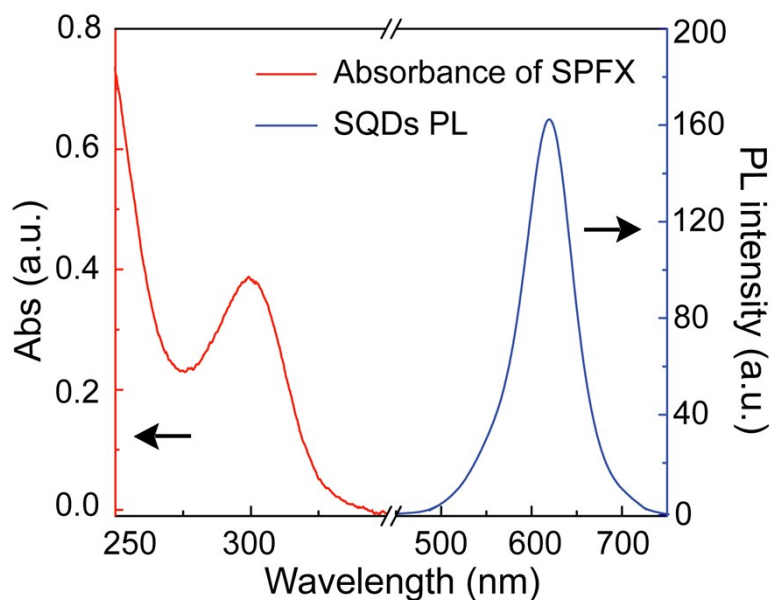

**Fig. S5** The absorbance of SPFX and the PL intensity of SQDs.

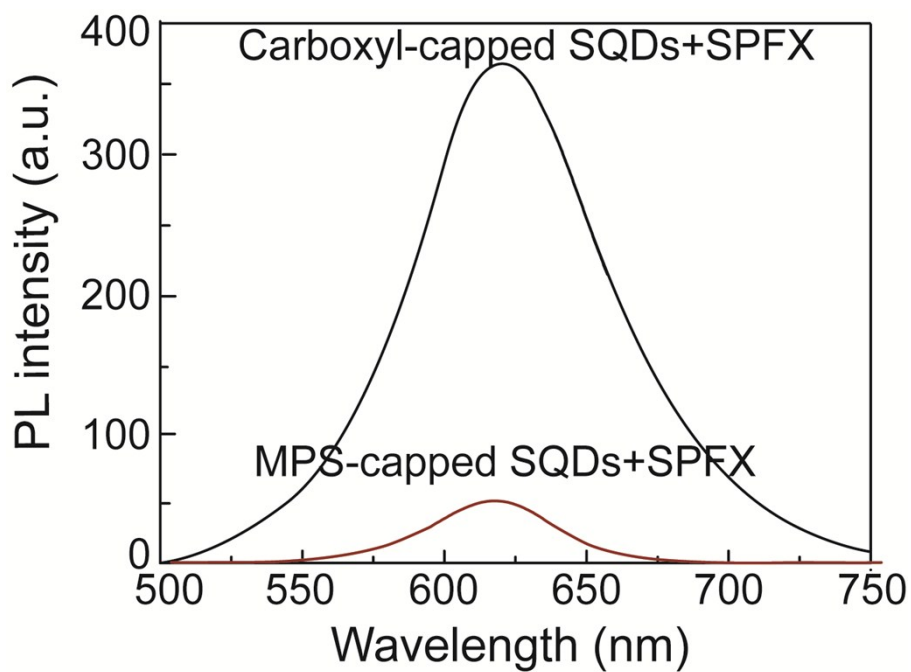

**Fig. S6** PL spectra of carboxyl-capped SQDs suspension or MPS-capped SQDs containing SPFX (20  $\mu$ M).

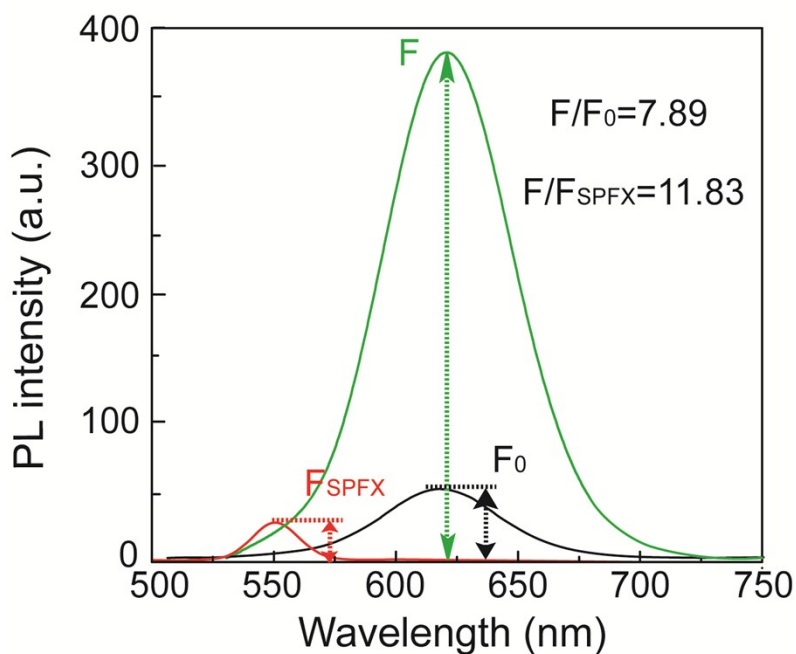

**Fig. S7** PL spectra of SQDs, SPFX and SQDs–SPFX system with SPFX concentration of 20  $\mu\text{M}$  (25  $^{\circ}\text{C}$ , pH=7.5, black trace-SQDs; red trace-SPFX; green trace-SQDs-SPFX system).

**Table S1** Comparison of limit of detection (LOD) of different methods for the determination of SPFX.

| Method                 | Linear range<br>( $\mu\text{M}$ ) | Detection limit<br>( $\mu\text{M}$ ) | Reference |
|------------------------|-----------------------------------|--------------------------------------|-----------|
| UV-VIS                 | 4.1–40                            | 0.05                                 | [2]       |
| Electrochemistry (DPV) | 0.2–1.4                           | 0.08                                 | [3]       |
| Fluorescence (QDs)     | 1.3–76                            | 0.35                                 | [4]       |
| Fluorescence (Yttrium) | 0.8–14                            | 0.09                                 | [5]       |
| HPTLC                  | 0.25–2.0                          | 0.13                                 | [6]       |
| LC-MS                  | 0.03–2.5                          | 0.005                                | [7]       |
| This method (SQDs)     | 0.05–200                          | 0.035                                | This work |

**Table S2** The  $F/F_0$  when SQDs mixed with other substances.

| Reagent                   | Groups    | $F/F_0$ |
|---------------------------|-----------|---------|
| Dichlofluanid             | -F        | 9.05    |
| Citric Acid               | -COOH     | 3.58    |
| p-Dihydroxybenzene        | -OH       | 1.35    |
| Pyrrole                   | -N        | 2.39    |
| 5-Fluorouracil            | -F, -N    | 6.53    |
| Pyrrole-3-carboxylic acid | -N, -COOH | 4.81    |
| N-Phenylacetamide         | -N, -CO   | 2.05    |
| Benzene                   | -         | 0.51    |

## References

- [1] A. Jaiswal, S. S. Ghosh and A. Chattopadhyay, *Chem. Commun.*, 2012, **48**: 407-409.
- [2] A. M. El-Didamony, *Anal. Lett.*, 2007, **40**: 2708-2720.
- [3] A. E. Radi, T. Wahdan, Z. Anwar and H. Mostafa, *Electroanalysis*, 2010, **22**: 2665-2671.
- [4] M. Hou, X. Y. Yan and L. Xiong, *J. Lumin.*, 2015, **157**: 58-62.
- [5] A. M. El-Didamony, *Luminescence*, 2011, **26**: 112-117.
- [6] V. D. Mody, K. K. Pandya, M. C. Satia, I. A. Modi, R. I. Modi and T. P. Gandhi, *J. Pharmaceut. Biomed.*, 1998, **16**: 1289-1294.
- [7] K. Noh, K. Kwon, T. C. Jeong and W. K. Kang, *Biomed. Chromatogr.*, 2010, **24**: 1199-1202.
